# Supplementary material for: Role of Radiofrequency Ablation and Cement Injection for Pain Control in Patients with Spinal Metastasis
Source: Research Square preprint supplement (doi:10.21203/rs.3.rs-226504/v1), 2021-02-23
Supplement: Supplementary file 1 [file 39625dc52420b6f264c5d86c.docx]

| **VAS Scale** | | | | | | |
| --- | --- | --- | --- | --- | --- | --- |
| **Group** | **PreT.** | **PostT. d** | **PostT. 1m** | **PostT. 3m** | **PostT. 6m** | **P value** |
| **RFA** | 8,33±1,07a* | 4,83±1,03b,c | 3,67±1,07,b | 4,50±1,57 | 4,42±1,08c | a*= p< 0.001  b= p < 0.001  c= p < 0.05 |
| **RFA+VP** | 7,44±1,06a* | 4,38±1,00*b | 2,94±1,04*c | 2,44±1,61 | 2,31±1,42 | a*= p < 0.001  b*= p<0.001  c*= p < 0,05 |


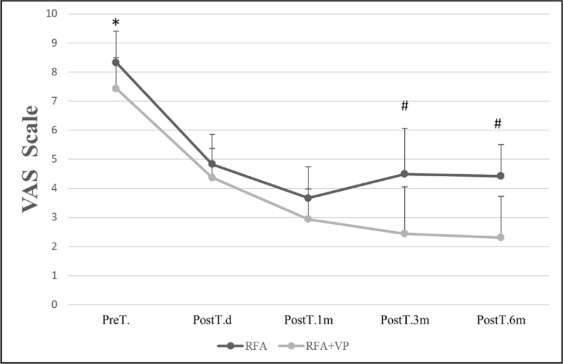

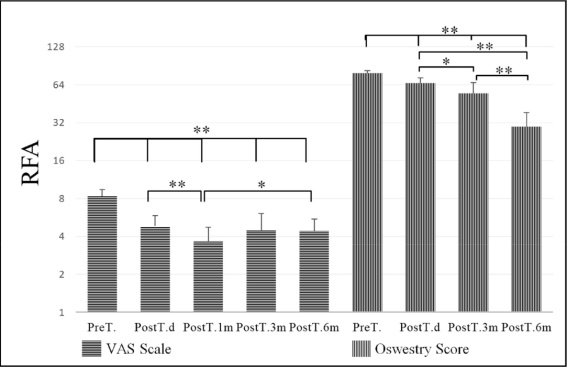


**Table 1: VAS:** Visual Analog Scale **RFA:** Radiofrequency ablation **RFA+VP:**Radiofrequency ablation+vertebroplasty, **Pre T.:**Pre-treatment, **Post T.d:** Post-treatment one day, **Post T 1m, 3m, 6 m:** Post-treatment one month, three month, six month

a*: According toPre-T among others

b*:According to PostT.damong PostT. 1m, PostT. 3m, PostT. 6m

c*: According to PostT.1m among PostT. 3m, PostT. 6m
